# Supplementary material for: Short-Term Protein Supplementation Does Not Alter Energy Intake, Macronutrient Intake and Appetite in 50–75 Year Old Adults
Source: MDPI journal article supplement (doi:10.3390/nu13051711), 2021-05-18
Supplement: s1 [file s1]

| <i>Nutrient</i>          | <i>Baseline</i>             | <i>Morning Supplementation</i> |                             | <i>Evening Supplementation</i> |                            |
|--------------------------|-----------------------------|--------------------------------|-----------------------------|--------------------------------|----------------------------|
|                          | <i>Median Intakes (IQR)</i> | <i>Median Intakes (IQR)</i>    | <i>p-value<sup>\$</sup></i> | <i>Median Intakes (IQR)</i>    | <i>p-value<sup>#</sup></i> |
| <b>Dietary fibre (g)</b> | 20.6 (16.7-30.0)            | 23.3 (16.4-26.0)               | 0.849                       | 22.6 (14.0-26.3)               | 0.143                      |
| <b>Calcium (mg)</b>      | 1058.5<br>(813.3-1345.3)    | 1039.0<br>(916.0-1308.0)       | 0.368                       | 953.0<br>(822.8-1145.0)        | 0.738                      |
| <b>Magnesium (mg)</b>    | 360.0 (320.5-449.3)         | 375.5 (295.5-424.0)            | 0.833                       | 368.5 (291.3-434.5)            | 0.278                      |
| <b>Sodium (mg)</b>       | 1867.5 (1402.0-2183.3)      | 1882.5 (1374.3-2480.0)         | 0.459                       | 1784.5 (1431.0-2179.3)         | 0.580                      |
| <b>Potassium (mg)</b>    | 3601.0 (3024.8-4216.3)      | 3444.5 (3058.0-3781.5)         | 0.924                       | 3211.5 (2895.5-3605.5)         | 0.143                      |
| <b>Iron (mg)</b>         | 11.4 (8.0-13.8)             | 11.7 (8.4-14.9)                | 0.738                       | 11.2 (9.7-14.1)                | 0.978                      |
| <b>Retinol (µg)</b>      | 334.5 (223.8-414.5)         | 274.0 (219.0-378.5)            | 0.360                       | 287.5 (225.5-478.5)            | 0.752                      |
| <b>Carotene (µg)</b>     | 2316.0 (1218.0-3972.8)      | 2926.5 (1620.3-4792.3)         | 0.293                       | 1507.5 (629.8-3850.0)          | 0.979                      |
| <b>Riboflavin (mg)</b>   | 2.02 (1.67-2.39)            | 2.12 (1.63-2.44)               | 0.803                       | 1.82 (1.59-2.31)               | 0.710                      |
| <b>Vitamin B6 (mg)</b>   | 1.60 (1.32-1.75)            | 1.63 (1.38-1.78)               | 0.837                       | 1.61 (1.35-1.87)               | 0.613                      |
| <b>Vitamin B12 (µg)</b>  | 5.80 (3.50-7.63)            | 5.20 (3.15-6.65)               | 0.721                       | 5.45 (3.18-6.43)               | 0.344                      |
| <b>Vitamin C (mg)</b>    | 103.5 (86.0-124.0)          | 88.5 (76-114.8)                | 0.558                       | 82.0 (58.5-125.5)              | 0.246                      |
| <b>Vitamin D (µg)</b>    | 2.79 (2.22-4.98)            | 3.17 (1.34-5.63)               | 0.525                       | 2.56 (1.01-4.24)               | 0.543                      |
| <b>Vitamin E (mg)</b>    | 8.51 (6.70-11.41)           | 8.15 (6.86-12.44)              | 0.311                       | 9.13 (6.35-11.84)              | 0.312                      |

*Figure S1; Supplementary material displaying Median (IQR) dietary fibre and micronutrient intakes of all participants, per day, across the different phases of the trial.*

*g=grams; mg=milligrams, µg=micrograms.*

*P values are baseline compared to invention phase; IQR: Inter-Quartile Range; \$ represent baseline-morning and # denotes baseline-evening*
